# Supplementary material
Source: MDPI journal article supplement (https://www.mdpi.com/1996-1073/11/8/1992)
Supplement: s1 [file s1]

Figure A1

Figure A1 below shows the coefficient of performance of the N80 turbine which data was used in the study. The Betz limit (0.59) theoretically expresses the maximum efficiency with which a wind turbine can extract power from wind flow through the blades. Although turbine efficiency varies with wind speed, a few studies on estimation/forecast errors and performance evaluations assume a constant  $C_p$ , an assumption which should be clearly stated so as to increase the accuracy and interpretation of results.

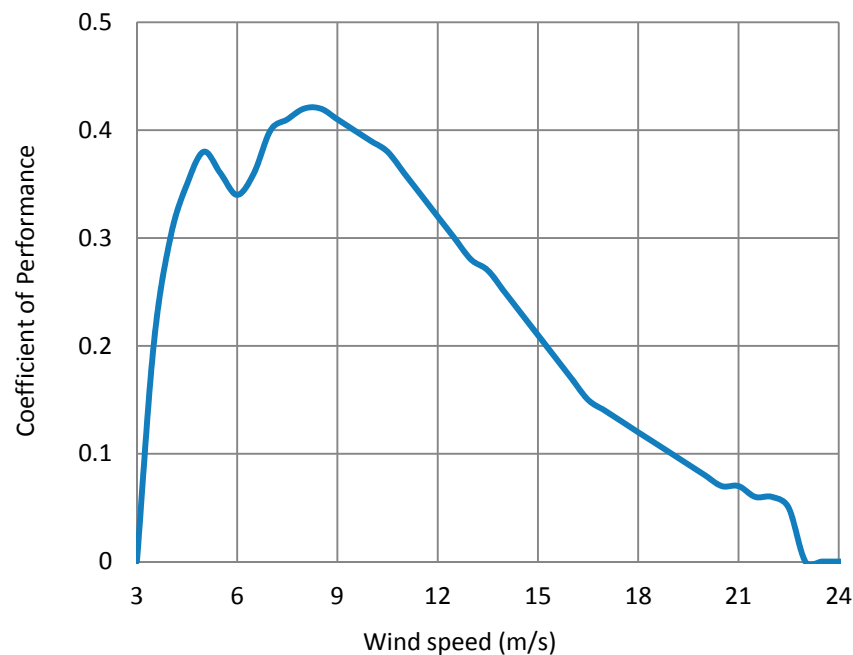

**Figure A1.** Coefficient of Performance curve profile for the Nordex-N50 wind turbine. (Source: Adapted from [www.en.wind-turbine-models.com/turbines/392-nordex-n-50](http://www.en.wind-turbine-models.com/turbines/392-nordex-n-50)).
